# Supplementary material for: Twist-boat conformation in graphene oxides
Source: Royal Society of Chemistry journal article supplement (doi:10.1039/c0nr00710b), 2010-11-03
Supplement: c0nr00710b.pdf [file c0nr00710b.pdf]

**Supporting Information****Twist-Boat Conformation in Graphene Oxides**

Duminda K. Samarakoon and Xiao-Qian Wang\*

*Department of Physics and Center for Functional Nanoscale Materials, Clark Atlanta University, 223 James P. Brawley Dr., SW, Atlanta, GA 30314, USA**\*E-mail: xwang@cau.edu***Structural Details**

We depict in Figure S1 the various fully-oxidized structures. The geometry details are listed in Table S1. Included epoxy-pair (strips) structure has the same structure as Figure S1.c, but with alternating pairs of  $sp^2$  and  $sp^3$  stripes, respectively. The calculated binding energy and gap are shown in Table S2. The calculated band gap for the twist-boat structure using the B3LYP functional is 6.42 eV.

**Table S1:** Fractional coordinates of various GO structures. All the structures are of  $D_{2h}$  symmetry. The coordinates of the other atoms can be determined by the symmetry operations.

| Structure                   | Symmetry    | Element | Fractional coordinates of atoms |          |          |
|-----------------------------|-------------|---------|---------------------------------|----------|----------|
|                             |             |         | <i>x</i>                        | <i>y</i> | <i>z</i> |
| Boat<br>(zigzag)            | <i>Pmmn</i> | C       | 0.6692                          | 0.0000   | 0.4887   |
|                             |             | O       | 0.5000                          | 0.0000   | 0.4055   |
| Twiste-boat<br>(armchair)   | <i>Pcca</i> | C       | 0.5840                          | -0.0087  | 0.6246   |
|                             |             | O       | 1.0000                          | -0.0773  | 0.2500   |
| Epoxy-pair<br>(zigzag)      | <i>Pmmm</i> | C       | 0.7053                          | 0.0000   | 0.5000   |
|                             |             | C       | -0.1418                         | 0.5000   | 0.5000   |
|                             |             | O       | 0.5000                          | 0.0000   | 0.4263   |
| Epoxy-pair<br>(alternating) | <i>Pbam</i> | C       | 0.5476                          | -0.1163  | -0.5000  |
|                             |             | C       | 0.8751                          | -0.1506  | -0.5000  |
|                             |             | O       | 0.5000                          | 0.5000   | -0.5724  |
| Twist-boat<br>chair         | <i>P2/c</i> | C       | 0.1505                          | -0.0216  | 0.1433   |
|                             |             | C       | 0.6684                          | -0.0101  | 0.9167   |
|                             |             | O       | 0.0752                          | 0.1074   | 0.5527   |
|                             |             | O       | 0.5000                          | -0.0877  | 0.7500   |
|                             |             | H       | 0.2619                          | 0.1379   | 0.7853   |
| Epoxy-pair<br>(armchair)    | <i>Pmma</i> | C       | 0.0000                          | 0.3342   | -0.0825  |
|                             |             | C       | 0.0000                          | 0.1039   | 0.0907   |
|                             |             | O       | 0.9407                          | 0.5000   | 0.0000   |
|                             |             | O       | 0.9407                          | 0.5000   | 0.5000   |

**Table S2:** Calculated binding energies per oxygen atom for various GO structures. For boat (zigzag),  $\Gamma = (0, 0)$ ,  $W = (\pi/2a_1, \pi/2b_1)$ ,  $L = (\pi/2a_1, 0)$ , where  $a_1=2.52 \text{ \AA}$ ,  $b_1=4.49 \text{ \AA}$ , respectively. For twist-boat (armchair),  $\Gamma = (0, 0)$ ,  $S = (\pi/2a_2, \pi/2b_2)$ ,  $D = (\pi/2a_2, 0)$ , where  $a_2=5.10 \text{ \AA}$ ,  $b_2=4.28 \text{ \AA}$ , respectively. For epoxy-pair,  $T = (\pi/2a_3, 0)$ , where  $a_3=4.50 \text{ \AA}$ ,  $b_3=2.52 \text{ \AA}$ , respectively;  $R = (\pi/2a_4, \pi/2b_4)$ , where  $a_4=4.60 \text{ \AA}$ ,  $b_4=5.47 \text{ \AA}$ , respectively; and  $Q = (\pi/2a_5, 0)$ ,  $a_5=5.10 \text{ \AA}$ ,  $b_5=4.48 \text{ \AA}$ .

| Structure                | C/O ratio and number of atoms per unit cell | Binding Energy (eV) | Gap (eV)                   | Unit Cell ( $\text{\AA}^2$ ) |
|--------------------------|---------------------------------------------|---------------------|----------------------------|------------------------------|
| Boat (zigzag)            | 2 (C4, O2)                                  | -23.39              | 2.95<br>direct at $\Gamma$ | 2.52×4.49                    |
| Twiste-boat (armchair)   | 2 (C8, O4)                                  | -23.65              | 4.40<br>direct at $\Gamma$ | 5.10×4.28                    |
| Epoxy-pair (zigzag)      | 2 (C4, O2)                                  | -23.06              | 0.40<br>direct at T        | 2.52×4.50                    |
| Epoxy-pair (alternating) | 2 (C8, O4)                                  | -23.54              | 1.85<br>direct at R        | 5.47×4.60                    |
| Twist-boat chair         | 4/3 (C8, O6, H4)                            | -20.13              | 3.22<br>direct at $\Gamma$ | 6.51×4.80                    |
| Epoxy-pair (armchair)    | 2 (C8, O4)                                  | -22.89              | 0.45<br>direct at Q        | 5.10×4.49                    |
| Epoxy-pair (strips)      | 2 (C8, O4)                                  | -23.82              | metallic                   | 2.51×10.14                   |

### Density-Functional Tight-binding Calculations

In order to characterize the randomly distributed carbonyl and hydroxyl functional groups on graphene, we have employed density-functional tight-binding approach on a large sample consisting of 84 carbon atoms. The large rectangular unit cell allows us to systematically investigate the corrugated patterns of fully oxidized GO.

The unit cell was constructed through randomly deposited hydroxyl and carbonyl groups on graphene. While for hydrogenated graphene one can employ a classical Tersoff potential to simulate the absorption, the corresponding approach with use of DFTB method remains elusive due to computational costs. To circumvent this problem, we started from the fully hydrogenated graphene samples and connect the nearest-neighbor pairs to epoxy oxidation pattern, whereas the remaining to hydroxyl onsite functional groups. The resultant configuration reasonably reproduces results from previous studies in that there is the aggregation of the functional groups and the chain-like configurations of hydroxyl patterns.

It is worth noting that such generated random samples preclude epoxy pairs as the formation of an epoxy pair needs to accompany a nearly “hollow” site. This

approximation is, however, justified from energy calculations of various ordered configurations.

The configurations with randomly distributed functional groups were subsequently relaxed with use of conjugate-gradient method. One of the optimized configurations is shown in Figure 2.

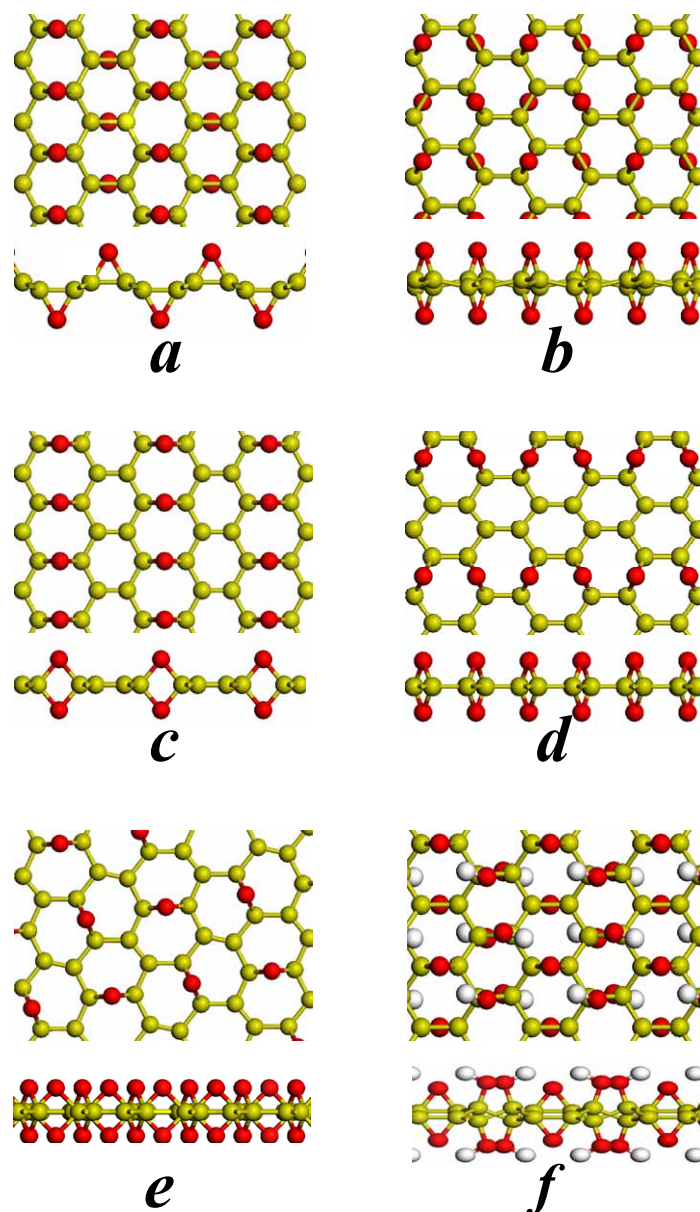

**Figure S1:** Top (and side) views of GO atomic structures for selected conformations: (a) Fully-oxidized epoxide-only boat phase  $C_2O$  with oxygen rows on both sides of the plane along the zigzag direction; (b) Fully-oxidized epoxide-only twist-boat  $C_2O$  phase along armchair; (c), (d), and (e) Epoxy-pair structures along zigzag, armchair, and alternating

Supplementary Material (ESI) for Nanoscale

This journal is © The Royal Society of Chemistry 2010

directions, respectively; (f) Twist-boat-chair structure with hydroxyl-epoxide strips separated by epoxide chain. Carbon, oxygen, and hydrogen atoms are colored with gold, red, and white, respectively.
